# Supplementary material for: Synthesis and characterization of self-assembled nanofiber-bundles of V2O5: their electrochemical and field emission properties
Source: Royal Society of Chemistry journal article supplement (doi:10.1039/c1nr11444a), 2011-12-07
Supplement: c1nr11444a.pdf [file c1nr11444a.pdf]

### Supporting Information

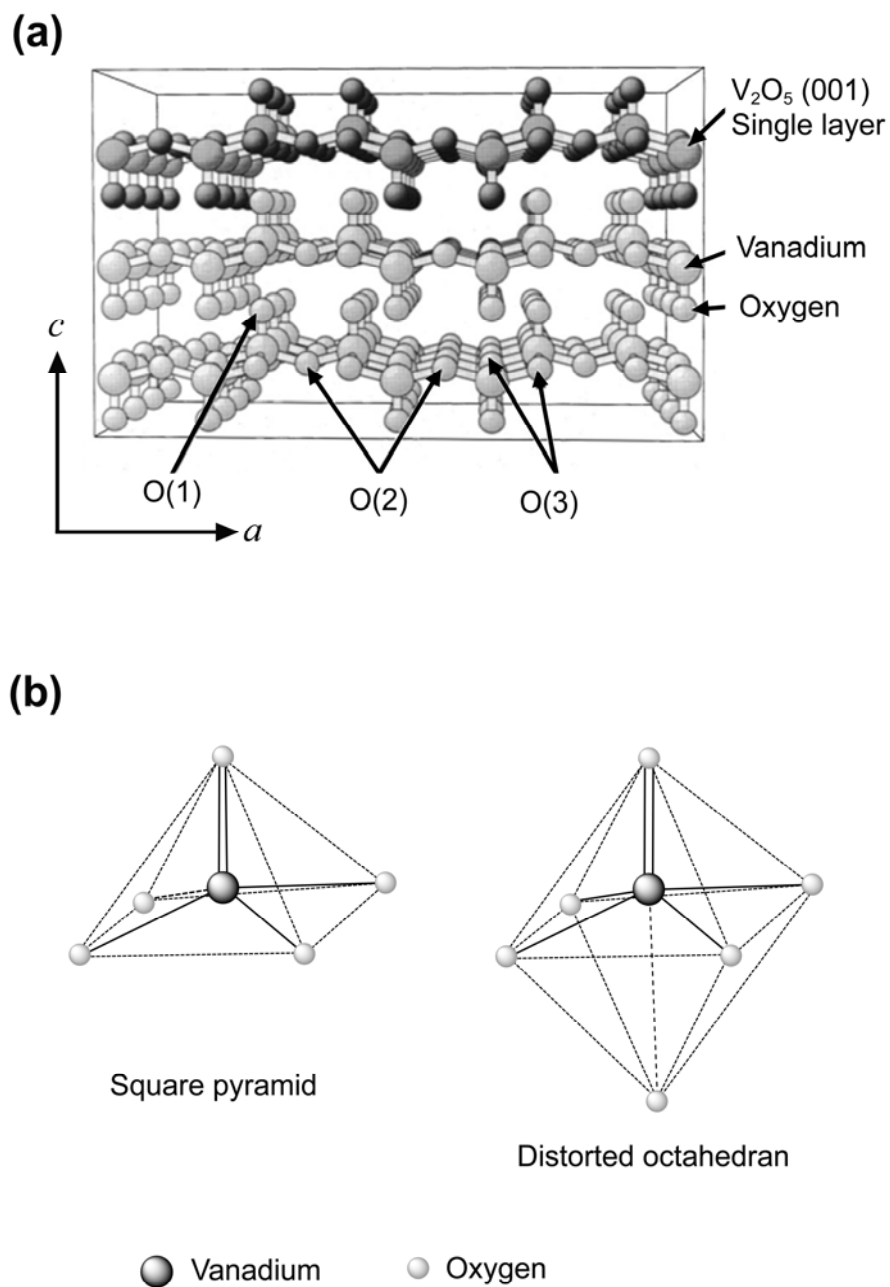

**Fig. S1** Representation of  $V_2O_5$  structure: (a) The layered orthorhombic structure and (b) square pyramid of  $VO_5$  and distorted octahedran of  $VO_6$  unit.

**Fig. S1**

**Fig S2**

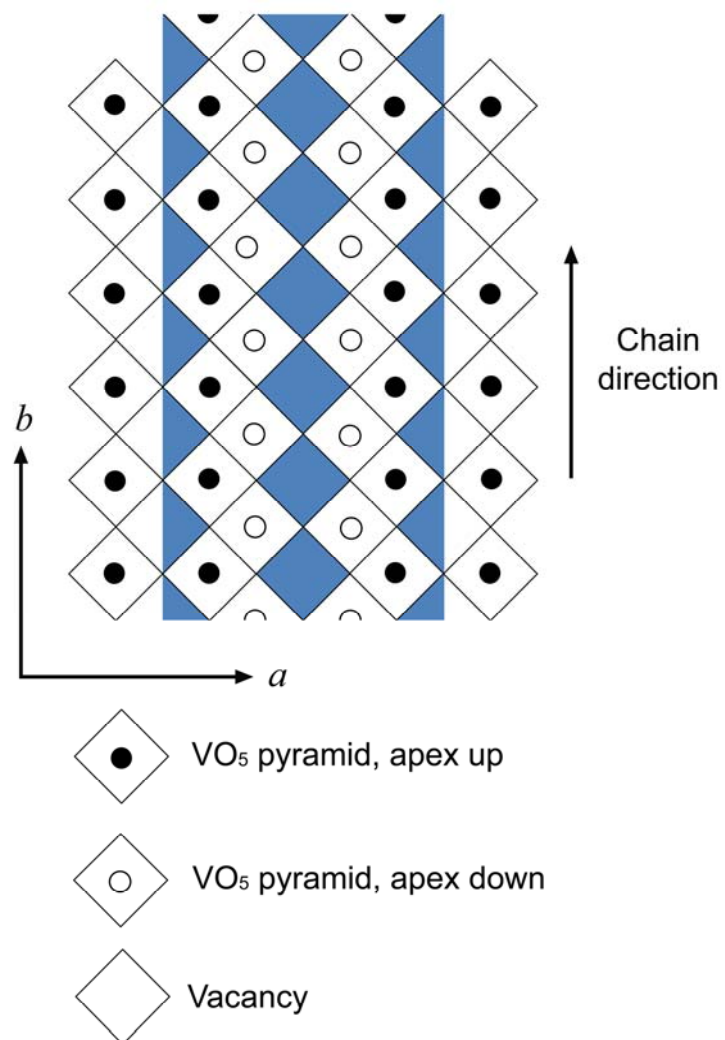

**Fig. S2** Single layer slab of  $V_2O_5$  nanofiber.

**Fig. S3**

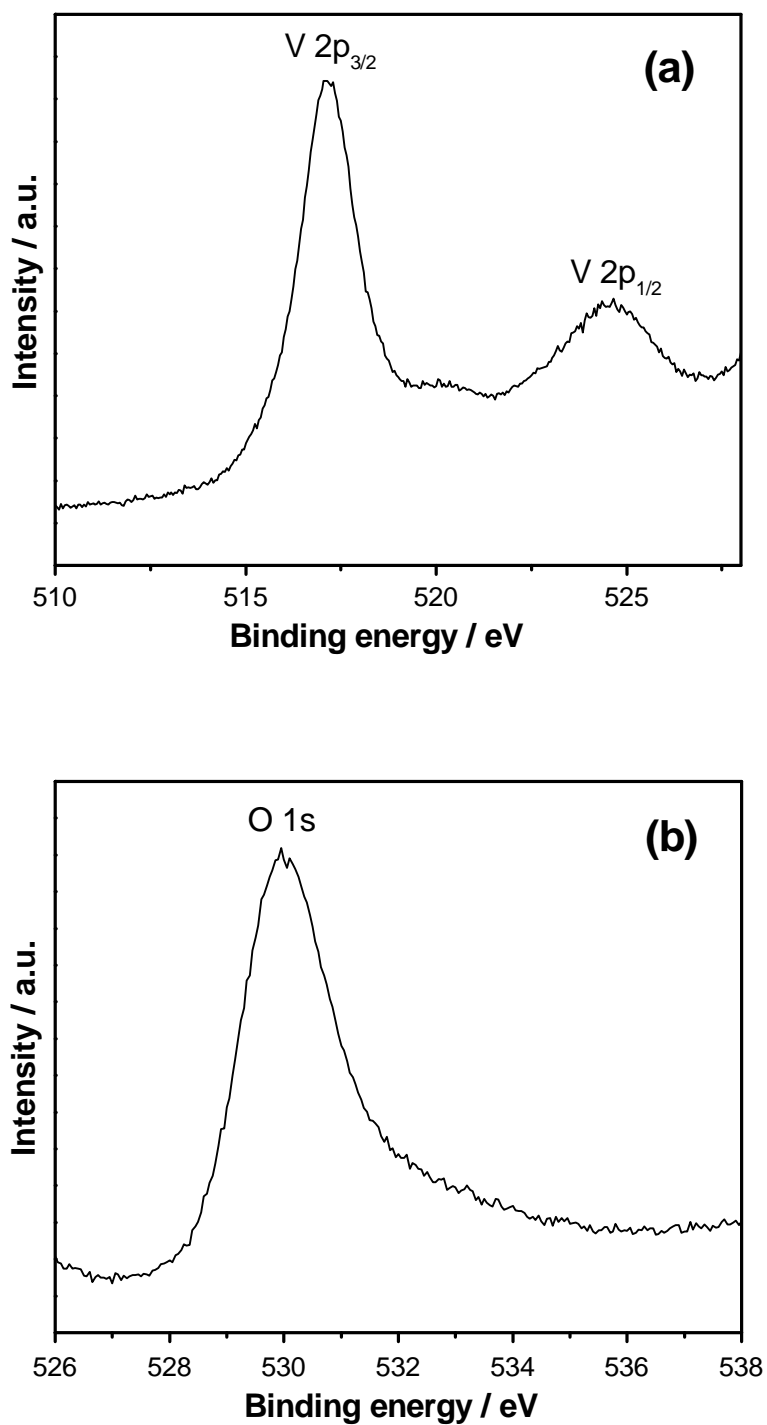

**Fig. S3** High resolution XPS spectra of the as prepared V<sub>2</sub>O<sub>5</sub> NBs: (a) V 2p and (b) O 1s.



**Fig. S5**

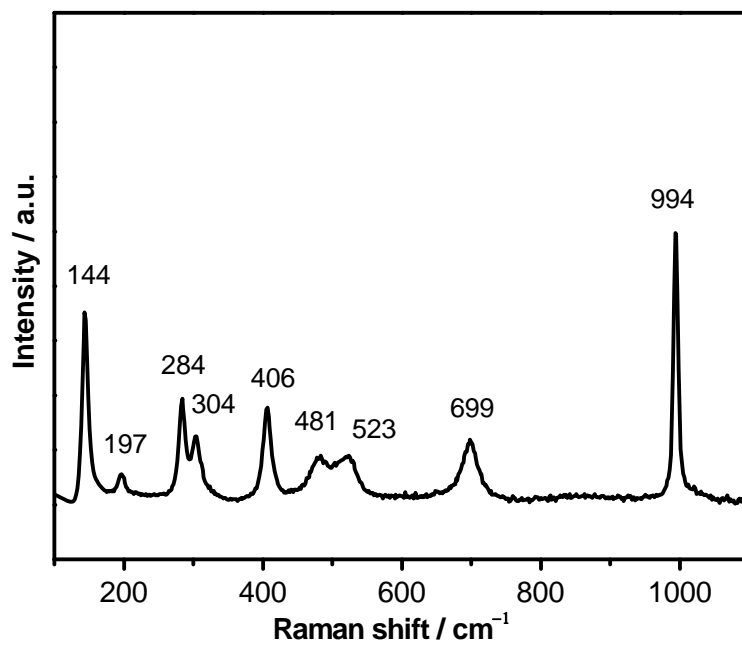

**Fig. S5** Raman spectrum of the as-prepared V<sub>2</sub>O<sub>5</sub> NBs.

**Fig. S6**

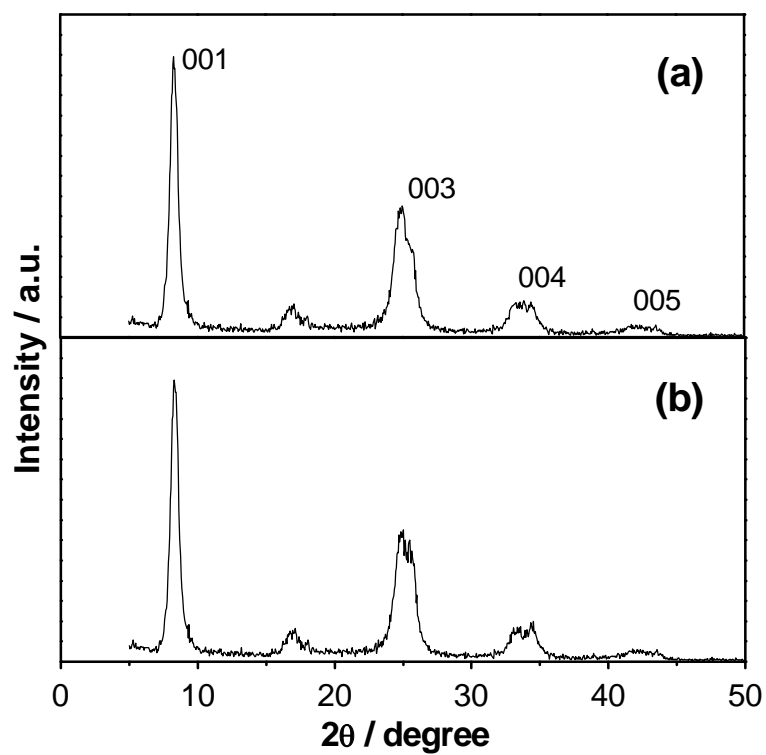

**Fig. S6** XRD pattern of  $V_2O_5$  prepared at (a) 220 °C in the 3 h reaction time and (b) 200 °C in the 24 h reaction time.

**Fig. S7**

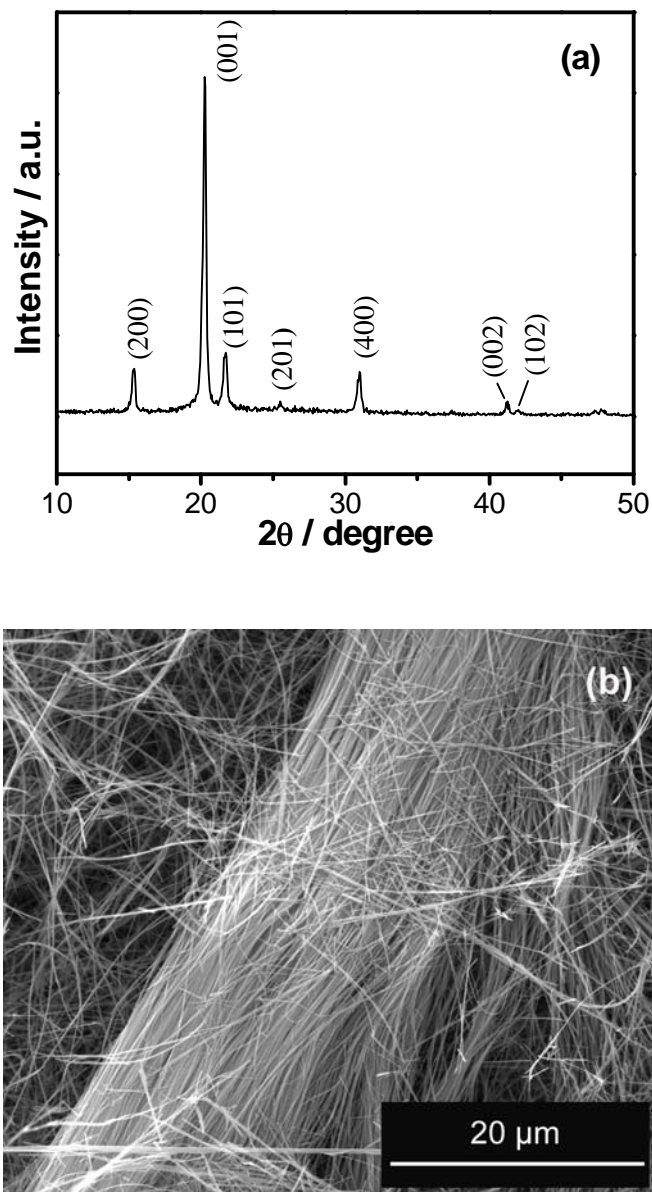

**Fig. S7** (a) XRD pattern and (b) SEM image of  $V_2O_5$  NBs prepared at 220 °C in the 24 h reaction time.

### Table S1

**Table S1:** V<sub>2</sub>O<sub>5</sub> formation at different temperatures and reaction times.

| reaction temperature<br>(± 5 °C) | reaction time (h) | products                                                 |
|----------------------------------|-------------------|----------------------------------------------------------|
| 220                              | 3                 | layered V <sub>2</sub> O <sub>5</sub> ·nH <sub>2</sub> O |
| 220                              | 7                 | V <sub>2</sub> O <sub>5</sub> NBs                        |
| 220                              | 24                | V <sub>2</sub> O <sub>5</sub> NBs                        |
| 200                              | 7 and 24          | layered V <sub>2</sub> O <sub>5</sub> ·nH <sub>2</sub> O |
| < 200                            | 7 and 24          | no product                                               |
